# Supplementary material for: Reversible amyloids of pyruvate kinase couple cell metabolism and stress granule disassembly
Source: Research Square preprint supplement (doi:10.21203/rs.3.rs-311638/v1), 2021-03-18
Supplement: Supplementary file 1 [file 335328098bed0fd18db8d862.xlsx]

## Sheet: Strains
Table S1: Yeast strains used in this study
Strain name	Genotype	Source
cdc19Δ + Pyk2OE	BY4741, cdc19∆::NATR; pRS416-pTEF1-PYK2	Saad et al.
Cdc19WT-GFP	BY4741, CDC19::CDC19-GFP-HIS3	Invitrogen
Cdc19WT-GFP + tps1Δ	BY4741, CDC19::CDC19-GFP-HIS3; tps1∆::KANR	This study
Cdc19WT-GFP + tps2Δ	BY4741, CDC19::CDC19-GFP-HIS3; tps2∆::KANR	This study
Cdc19WT-GFP + pfk2Δ	BY4741, CDC19::CDC19-GFP-HIS3; pfk2∆::KANR	This study
Cdc19WT-GFP + Pyk2OE	BY4741, CDC19::CDC19-GFP-HIS3; pRS416-pTEF1-PYK2	Saad et al.
Cdc19WT-GFP + Hsp104-mCherry	BY4741, CDC19::CDC19-GFP-HIS3; HSP104::HSP104-mCherry	This study
Cdc19WT-GFP + Ssa2-mCherry	BY4741, CDC19::CDC19-GFP-HIS3; SSA2::SSA2-mCherry	This study
Cdc19irrev-GFP	BY4741, CDC19::CDC19-T372D, T376D, S377D, S385D-GFP-HIS3	Saad et al.
Cdc19irrev-GFP + tps1Δ	BY4741, CDC19::CDC19-T372D, T376D, S377D, S385D-GFP-HIS3; tps1∆::KANR	This study
Cdc19irrev-GFP + tps1Δ + pfk2Δ	BY4741, CDC19::CDC19-T372D, T376D, S377D, S385D-GFP-HIS3; tps1∆::NATR; pfk2∆::KANR	This study
Cdc19irrev-GFP + Pyk2OE	BY4741, CDC19::CDC19-T372D, T376D, S377D, S385D-GFP-HIS3; pRS416-pTEF1-PYK2	This study
Cdc19irrev-GFP Original suppressor	BY4741, CDC19::CDC19-T372D, T376D, S377D, S385D-GFP-HIS3; tps3-G386D	This study
Cdc19irrev-GFP + tps3Δ	BY4741, CDC19::CDC19-T372D, T376D, S377D, S385D-GFP-HIS3; tps3∆::KANR	This study
Cdc19irrev-GFP + tps2Δ	BY4741, CDC19::CDC19-T372D, T376D, S377D, S385D-GFP-HIS3; tps2∆::KANR	This study
Cdc19irrev-GFP + tps2Δ + pfk2Δ	BY4741, CDC19::CDC19-T372D, T376D, S377D, S385D-GFP-HIS3; tps2∆::NATR; pfk2∆::KANR	This study
Cdc19irrev-GFP + tps1Δ + tps2Δ	BY4741, CDC19::CDC19-T372D, T376D, S377D, S385D-GFP-HIS3; tps1∆::KANR; tps2∆::NATR	This study
Cdc19irrev-GFP + Hsp104-mCherry	BY4741, CDC19::CDC19-T372D, T376D, S377D, S385D-GFP-HIS3 HSP104::HSP104-mCherry	This study
Cdc19irrev-GFP + Ssa2-mCherry	BY4741, CDC19::CDC19-T372D, T376D, S377D, S385D-GFP-HIS3; SSA2::SSA2-mCherry	This study
Cdc19irrev-GFP + tps1Δ + Hsp104-mCherry	BY4741, CDC19::CDC19-T372D, T376D, S377D, S385D-GFP-HIS3; tps1∆::KANR; HSP104::HSP104-mCherry	This study
Cdc19irrev-GFP + tps1Δ + Ssa2-mCherry	BY4741, CDC19::CDC19-T372D, T376D, S377D, S385D-GFP-HIS3; tps1∆::KANR ;SSA2::SSA2-mCherry	This study
Cdc19ΔFBP-GFP	BY4741, CDC19::CDC19-T402E-GFP-HIS3 ; pRS416-pTEF1-PYK2	Saad et al.
Cdc19ΔFBP-GFP + tps1Δ	BY4741, CDC19::CDC19-T402E-GFP-HIS3 ; pRS416-pTEF1-PYK2; tps1∆::KANR	This study
Cdc19ΔFBP-GFP + Hsp104-mCherry	BY4741, CDC19::CDC19-T402E-GFP-HIS3 ; pRS416-pTEF1-PYK2; HSP104::HSP104-mCherry	This study
Cdc19ΔFBP-GFP + tps1Δ + Hsp104-mCherry	BY4741, CDC19::CDC19-T402E-GFP-HIS3 ; pRS416-pTEF1-PYK2; tps1∆::KANR; HSP104::HSP104-mCherry	This study
Cdc19Not-agg-GFP	BY4741, CDC19::CDC19-R49A-GFP- HIS3; pRS416-pTEF1-PYK2	Saad et al.
Cdc19irrev-GFP + Hsp104OE	BY4741, CDC19::CDC19-T372D, T376D, S377D, S385D-GFP-HIS3 HSP104::HSP104-mCherry	This study
Cdc19irrev-GFP + Ssa2OE	BY4741, CDC19::CDC19-T372D, T376D, S377D, S385D-GFP-HIS3; SSA2::SSA2-mCherry	This study
Cdc19irrev-GFP + Hsp104OE + Ssa2OE	BY4741, CDC19::CDC19-T372D, T376D, S377D, S385D-GFP-HIS3; SSA2 Gal GST; Hsp104OE	This study
Cdc19irrev-GFP + tps1Δ + Hsp104OE	BY4741, CDC19::CDC19-T372D, T376D, S377D, S385D-GFP-HIS3; tps1∆::KANR; Hsp104OE	This study
Cdc19irrev-GFP + tps1Δ + Hsp104OE + SsaeOE	BY4741, CDC19::CDC19-T372D, T376D, S377D, S385D-GFP-HIS3; tps1∆::KANR ; Hsp104OE	This study
Cdc19WT-GFP + Pab1-CFP	BY4741, CDC19::CDC19-GFP-HIS3; pRS415-Pab1-CFP	Saad et al.
Cdc19WT-GFP + tps1Δ + Pab1-CFP	BY4741, CDC19::CDC19-GFP-HIS3; tps1∆::KANR; pRS415-Pab1-CFP	This study
Cdc19WT-GFP + tps2Δ + Pab1-CFP	BY4741, CDC19::CDC19-GFP-HIS3; tps2∆::KANR; pRS415-Pab1-CFP	This study
Cdc19WT-GFP + pfk2Δ + Pab1-CFP	BY4741, CDC19::CDC19-GFP-HIS3; pfk2∆::KANR; pRS415-Pab1-CFP	This study
Cdc19WT-GFP + Pab1-CFP + Pyk2OE	BY4741 CDC19::CDC19-GFP-HIS3; pRS416-pTEF1-PYK2; pRS415-Pab1-CFP	This study
Cdc19Irrev-GFP + Pab1-CFP	BY4741, CDC19::CDC19-T372D, T376D, S377D, S385D-GFP-HIS3; pRS415-Pab1-CFP	Saad et al.
Cdc19Irrev-GFP + tps1Δ + Pab1-CFP	BY4741, CDC19::CDC19-T372D, T376D, S377D, S385D-GFP-HIS3; tps1∆::KANR; pRS415-Pab1-CFP	This study
Cdc19irrev-GFP + tps3Δ + Pab1-CFP	BY4741, CDC19::CDC19-T372D, T376D, S377D, S385D-GFP-HIS3; tps3∆::KANR ; pRS415-Pab1-CFP	This study
Cdc19irrev-GFP + tps2Δ + Pab1-CFP	BY4741, CDC19::CDC19-T372D, T376D, S377D, S385D-GFP-HIS3; tps2∆::KANR ; pRS415-Pab1-CFP	This study
Cdc19irrev-GFP + tps1Δ + tps2Δ + Pab1-CFP	BY4741, CDC19::CDC19-T372D, T376D, S377D, S385D-GFP-HIS3; tps1∆::KANR; tps2∆::NATR; pRS415-Pab1-CFP	This study
Cdc19Irrev-GFP + tps1Δ + pfk2Δ + Pab1-CFP	BY4741, CDC19::CDC19-T372D, T376D, S377D, S385D-GFP-HIS3; tps1∆::NATR; pfk2∆::KANR; pRS415-Pab1-CFP	This study
Cdc19irrev-GFP + tps2Δ + pfk2Δ + Pab1-CFP	BY4741, CDC19::CDC19-T372D, T376D, S377D, S385D-GFP-HIS3; tps2∆::NATR; pfk2∆::KANR; pRS415-Pab1-CFP	This study
Cdc19Irrev-GFP + Pyk2OE + Pab1-CFP	BY4741, CDC19::CDC19-T372D, T376D, S377D, S385D-GFP-HIS3; pRS416-pTEF1-PYK2; pRS415-Pab1-CFP	This study
Cdc19Irrev-GFP Original suppressor + Pab1-CFP	BY4741, CDC19::CDC19-T372D, T376D, S377D, S385D-GFP-HIS3; tps3-G386D; pRS415-Pab1-CFP	This study
Cdc19ΔFBP-GFP + Pab1-CFP	BY4741, CDC19::CDC19-T402E-GFP-HIS3 ; pRS416-pTEF1-PYK2; pRS415-Pab1-CFP	Saad et al.
Cdc19ΔFBP-GFP + tps1Δ + Pab1-CFP	BY4741, CDC19::CDC19-T402E-GFP-HIS3 ; pRS416-pTEF1-PYK2; tps1∆::KANR; pRS415-Pab1-CFP	This study
