# Supplementary material for: Reversible amyloids of pyruvate kinase couple cell metabolism and stress granule disassembly
Source: Research Square preprint supplement (doi:10.21203/rs.3.rs-311638/v1), 2021-03-18
Supplement: Supplementary file 1 [file c7195d8cb37defb4c07f31bb.ai]

**Supplementary Figure 1 - Cdc19 aggregates are amyloids both *in vitro* and *in vivo***

**A**

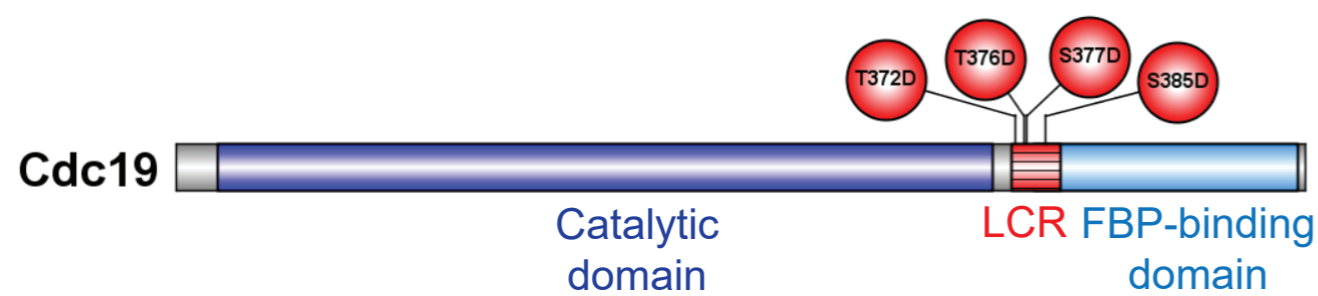

**B**

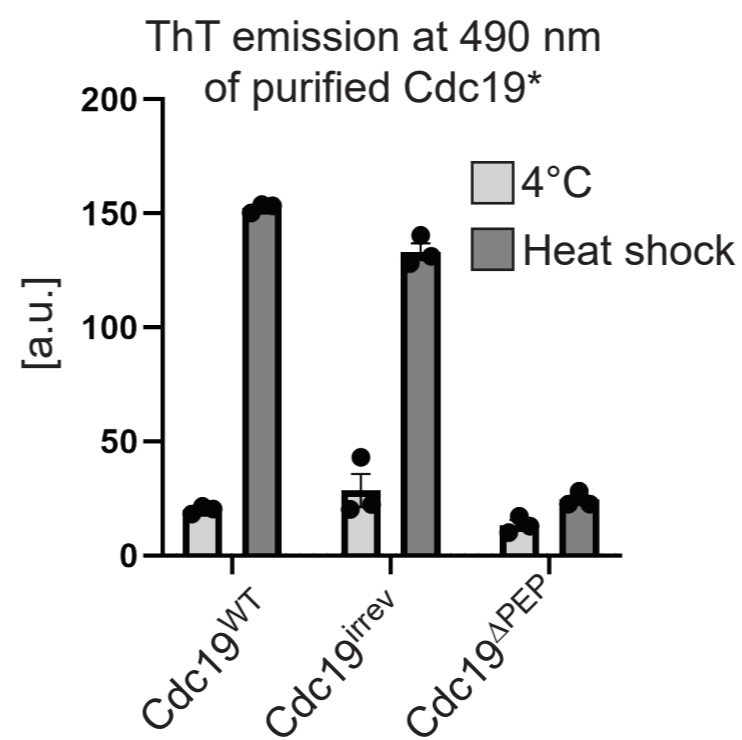

**C**

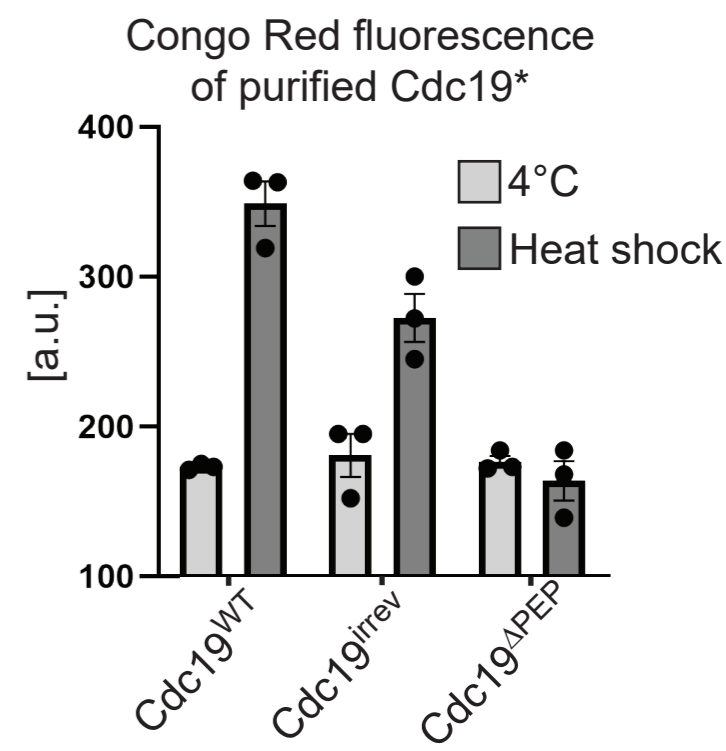

**D**

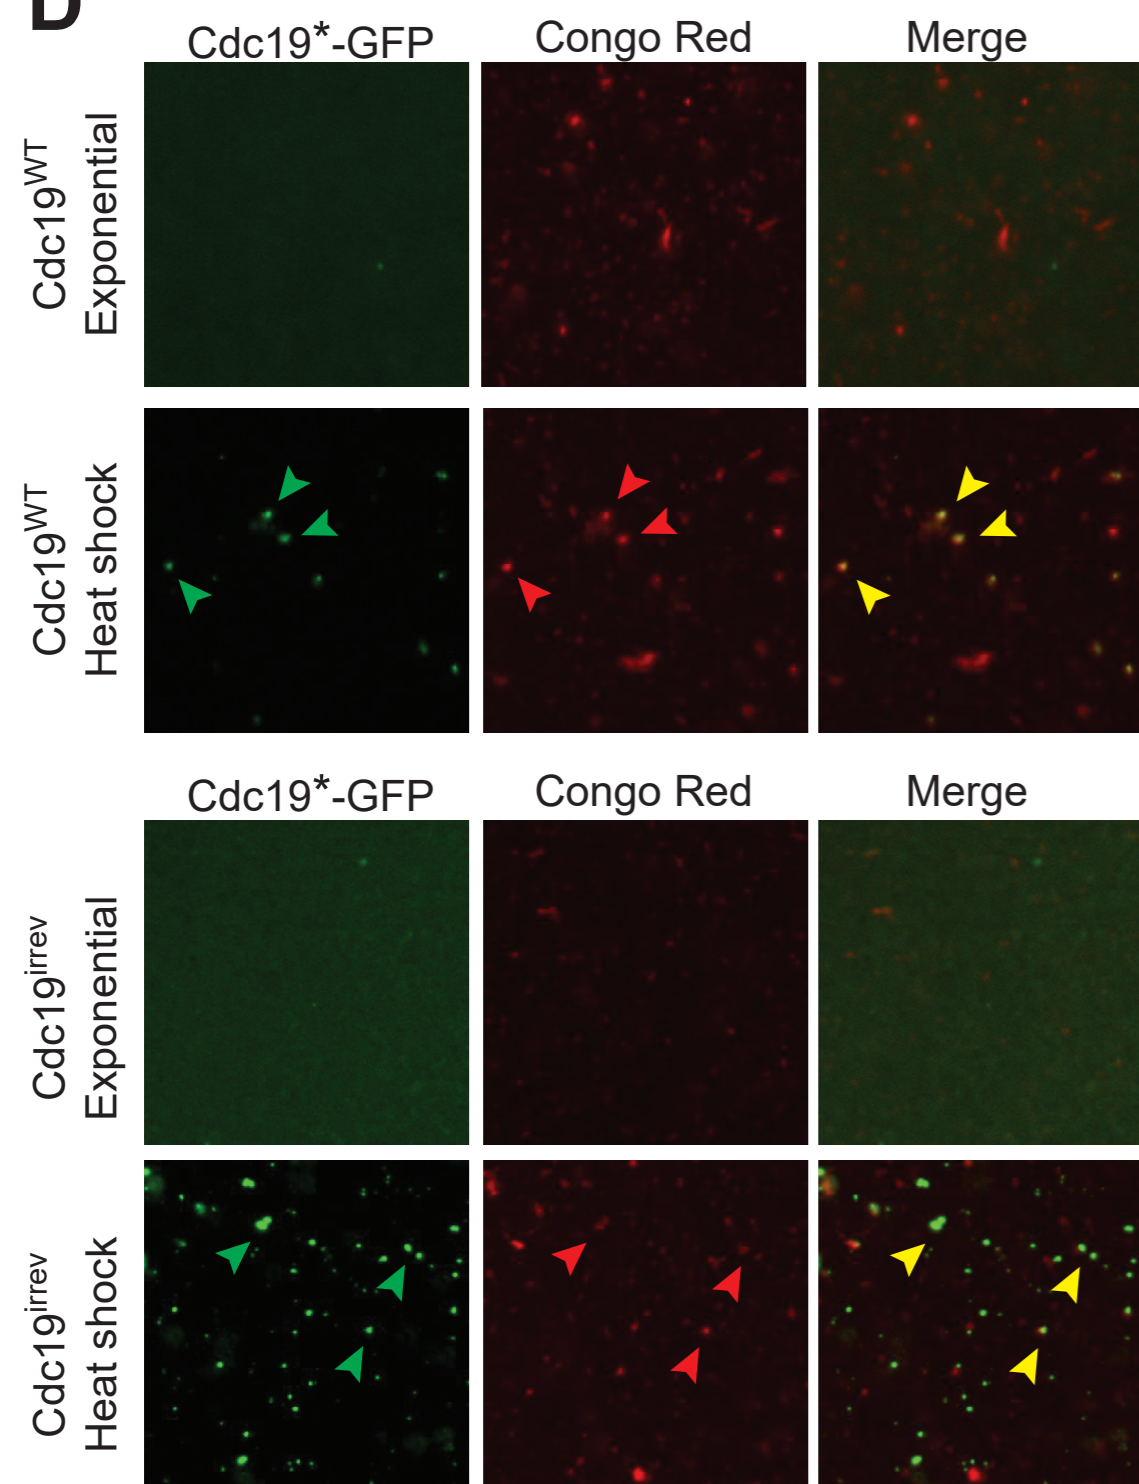

**E**

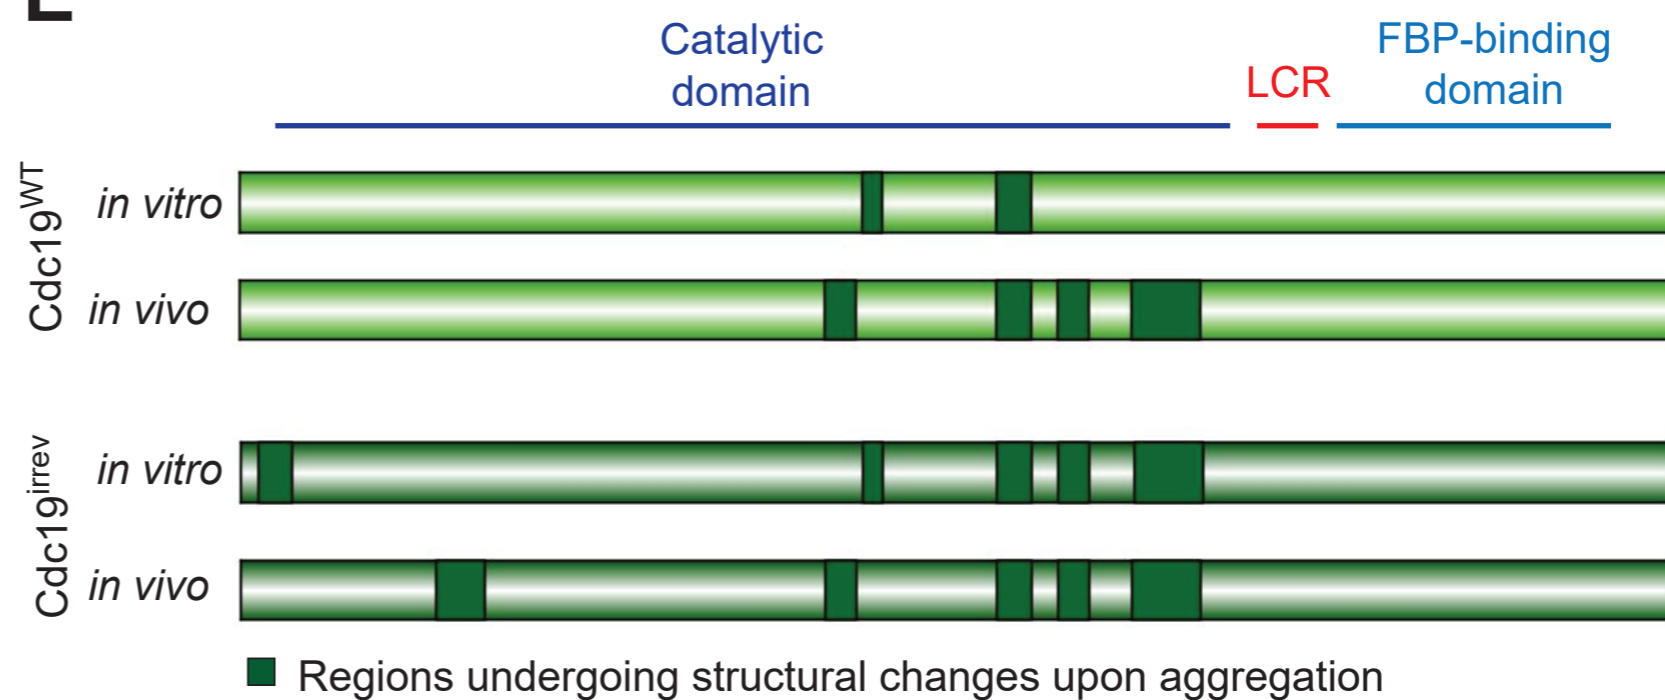

Changes in Cdc19<sup>WT</sup> upon heat shock

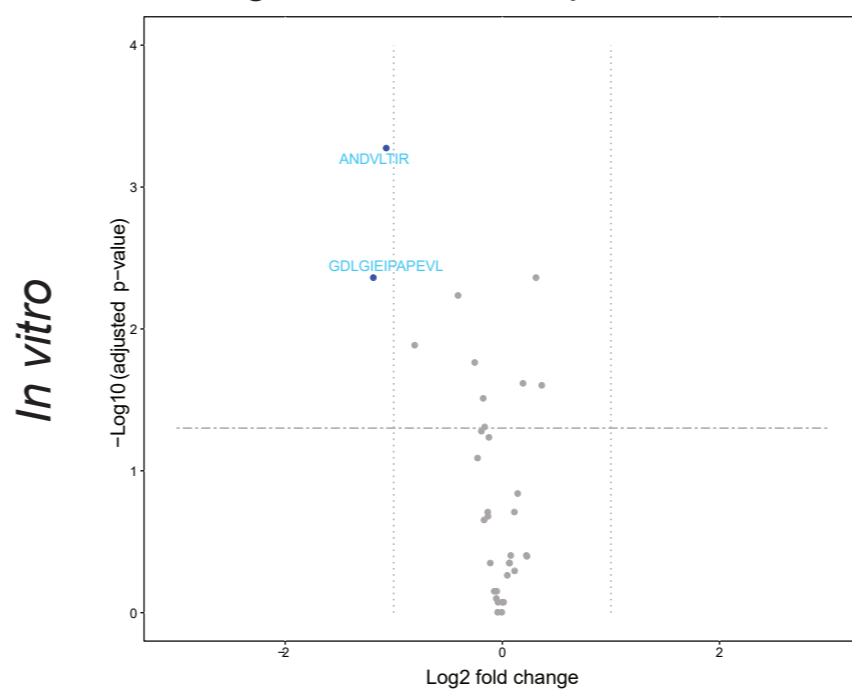

Changes in Cdc19<sup>irrev</sup> upon heat shock

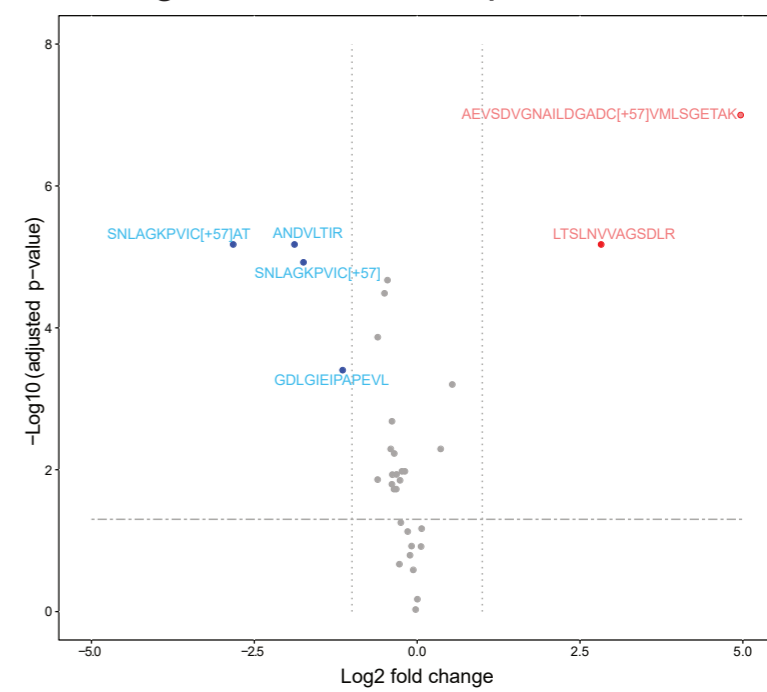

Changes in Cdc19<sup>WT</sup> upon starvation

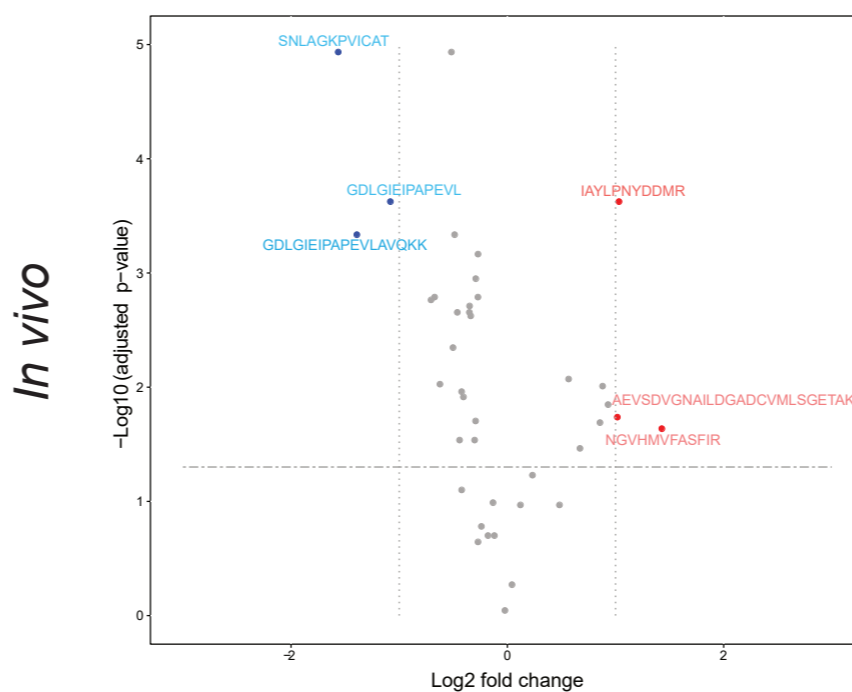

Changes in Cdc19<sup>irrev</sup> upon starvation

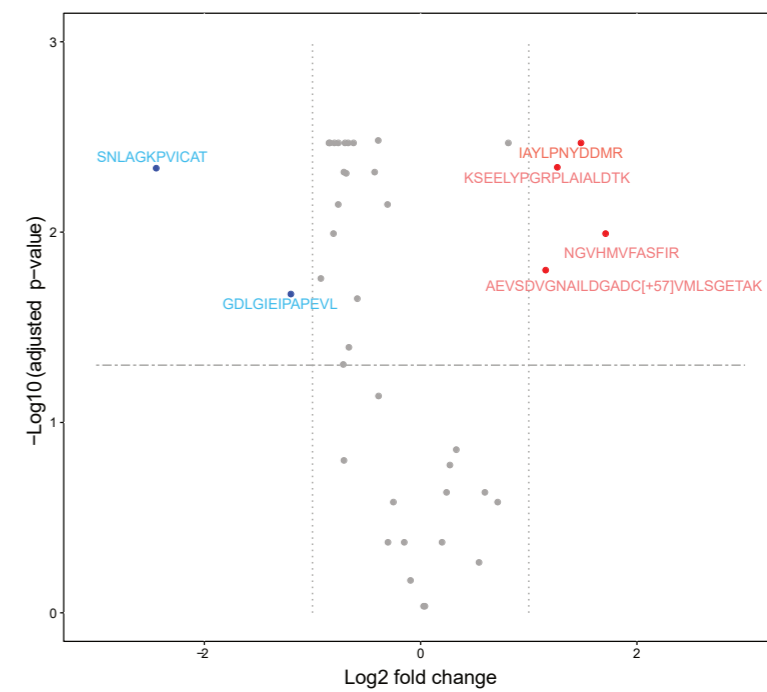

● Not regulated    --- Adjusted p-value cutoff  
● Down-regulated    ..... Fold change cutoff  
● Up-regulated
