# Supplementary material for: Reversible amyloids of pyruvate kinase couple cell metabolism and stress granule disassembly
Source: Research Square preprint supplement (doi:10.21203/rs.3.rs-311638/v1), 2021-03-18
Supplement: Supplementary file 3 [file a075b7492bd187c3de99025d.xlsx]

## Sheet: Plasmids
Table S2: Plasmids used in this study
Plasmid name	Genotype	Source
Cdc19WT	pRS413-pTEF1-CDC19	Grüning et al.
Pyk2OE	pRS416-pTEF1-PYK2	Saad et al.
Cdc19WT-GFP	pRS413-pTEF1-CDC19-GFP	Saad et al.
Cdc19ΔFBP-GFP	pRS413-pTEF1-CDC19-T402E-GFP	Saad et al.
Cdc19Not-agg-GFP	pRS413-pTEF1-CDC19-R49A-GFP	Saad et al.
Cdc19irrev-GFP	pRS413-pTEF1-CDC19-T372D, T376D, S377D, S385D-GFP	Saad et al.
GFP	pRS416-pGPD-GFP	Saad et al.
Pab1-CFP	pRS415-pPAB1-PAB1-CFP	Saad et al.
Cdc19WT-strepx2	pET17b-CDC19-Strepx2	Saad et al.
Cdc19Not-agg-strepx2	pET17b-CDC19-R49A-Strepx2	Saad et al.
Cdc19irrev-strepx2	pET17b-CDC19-T372D, T376D, S377D, S385D-Strepx2	This Study
Cdc19ΔFBP-strepx2	pET17b-CDC19-T402E-Strepx2	This study
1	Grüning, N.-M. et al. Pyruvate Kinase Triggers a Metabolic Feedback Loop that Controls Redox Metabolism in Respiring Cells. Cell metabolism 14, 415-427 (2011).
2	Saad S, et al. Reversible protein aggregation is a protective mechanism to ensure cell cycle restart after stress. Nat Cell Biol 19, 1202-1213 (2017).
